# Supplementary material for: Association between Cigarette Smoking Status and Composition of Gut Microbiota: Population-Based Cross-Sectional Study
Source: PubMed Central journal article supplement (PMC6162563; doi:10.3390/jcm7090282), 2018-09-14
Supplement: jcm-07-00282-s001.pdf [file jcm-07-00282-s001.pdf]

## Supplement data.

### Association between cigarette smoking status and composition of gut microbiota: population based cross-sectional study

#### Command

##### # UPARSE

Sequence merge: usearch91 -fastq\_mergepairs \*R1\*.fastq -relabel @ -fastq\_maxdiffs 20 -fastq\_maxdiffpct 20 -fastq\_minmergelen 300 -fastqout merged.fq -threads 10

Filter: usearch91 -fastq\_filter merged.fq -fastq\_maxee 1.0 -fastaout filtered.fa

Unique sequences: usearch91 -fastx\_uniques filtered.fa -fastaout uniques.fa -relabel Uniq -sizeout

OTUs picking: usearch91 -cluster\_otus uniques.fa -minsize 2 -otus otus.fa -relabel OTU

Phylogenetic tree: usearch91 -cluster\_agg otus.fa -treeout tree.phy

Taxonomy annotation: usearch91 -utax otus.fa -db 16s.udb -strand both -fastaout otus\_tax.fa

OTU table: usearch91 -usearch\_global merged.fq -db otus\_tax.fa -strand plus -id 0.97 -otutabout otutable\_tax.txt -biomout otutable\_tax.json

##### # Diversity

qiime diversity core-metrics-phylogenetic \

--i-phylogeny rooted-tree.qza \

--i-table table.qza \

--p-sampling-depth 1000 \

--m-metadata-file sample-metadata.txt \

--output-dir core-metrics-results

##### Alpha diversity

qiime diversity alpha-group-significance \

--i-alpha-diversity core-metrics-results/shannon\_vector.qza \

--m-metadata-file sample-metadata.txt \

--o-visualization core-metrics-results/shannon-group-significance.qzv

##### Beta diversity

qiime diversity beta-group-significance \

--i-distance-matrix core-metrics-results/weighted\_unifrac\_distance\_matrix.qza \

--m-metadata-file sample-metadata.txt \

```
--m-metadata-category smoking \  
--o-visualization core-metrics-results/weighted-unifrac-significance.qzv \  
--p-pairwise
```

## ANCOM

```
qiime feature-table filter-samples \  
--i-table table.qza \  
--m-metadata-file samples-to-keep.txt \  
--o-filtered-table index-filtered-table.qza
```

```
qiime composition add-pseudocount \  
--i-table table_gut.qza \  
--o-composition-table comp-gut-table.qza
```

```
qiime composition ancom \  
--i-table comp-gut-table.qza \  
--m-metadata-file sample-metadata.txt \  
--m-metadata-category Subject \  
--o-visualization ancom-Subject.qzv
```

```
qiime taxa collapse \  
--i-table table_gut.qza \  
--i-taxonomy taxonomy.qza \  
--p-level 2 \  
--o-collapsed-table table_gut_l2.qza
```

```
qiime composition add-pseudocount \  
--i-table table_gut_l2.qza \  
--o-composition-table comp-gut-table-l2.qza
```

```
qiime composition ancom \  
--i-table comp-gut-table-l2.qza \  
--m-metadata-file sample-metadata.txt \  
--m-metadata-category Subject \  
--o-visualization l2-ancom-Subject.qzv
```

**Figure S1 Results of alpha diversity using the Shannon index among current smokers, former smokers, and never smokers.** The line in each box means the median of data. *P*-value among three groups were estimated using the Kruskal-Wallis test.

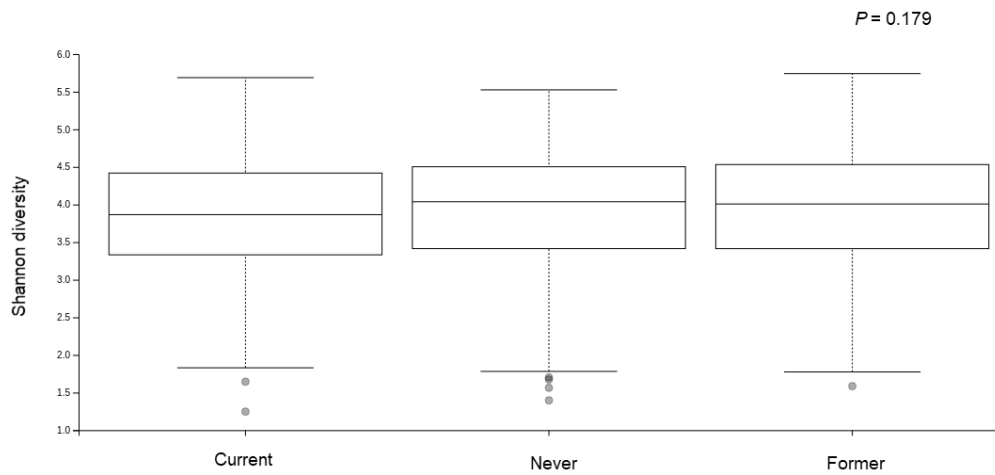

**Figure S2 Results of alpha diversity using the Shannon index between current smokers and current non-smokers.** The line in each box means the median of data. *P*-value between two groups was estimated using the Mann-Whitney U test.

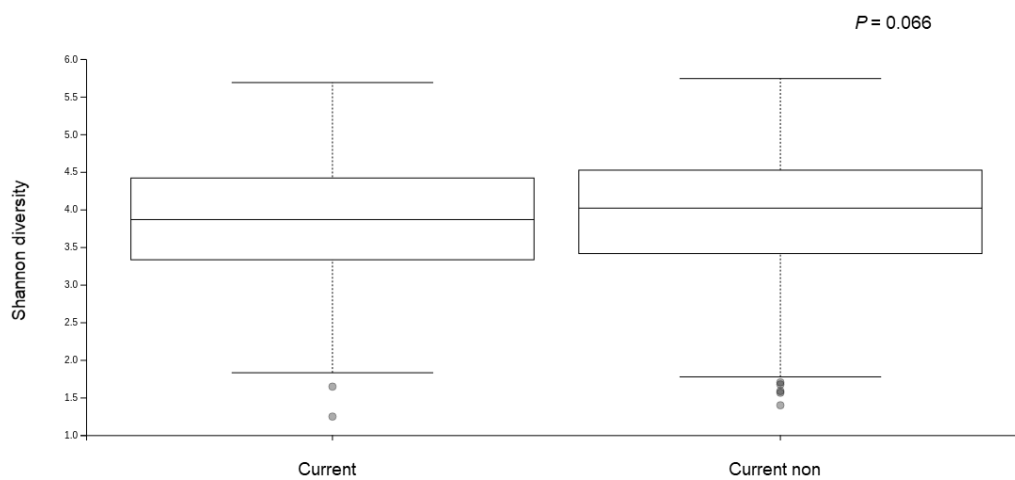

### Figure S3 Results of beta diversity between current smokers and current non-smokers

(A) Results of beta diversity using the Jaccard measure between current smokers and current non-smokers. (B) Results of beta diversity using weighted UniFrac measure between current smokers and current non-smokers. The y-axis represents the distance of each group to the current group (baseline). In both Jaccard measure and Weight UniFrac measure, the line in each box means the median of data. In both  $P$ -values between two groups were estimated using the PERMANOVA. PERMANOVA for the pairwise comparison of the diversity analysis was calculated with 999 Monte Carlo permutation and Benjamini-Hochberg correction (FDR).

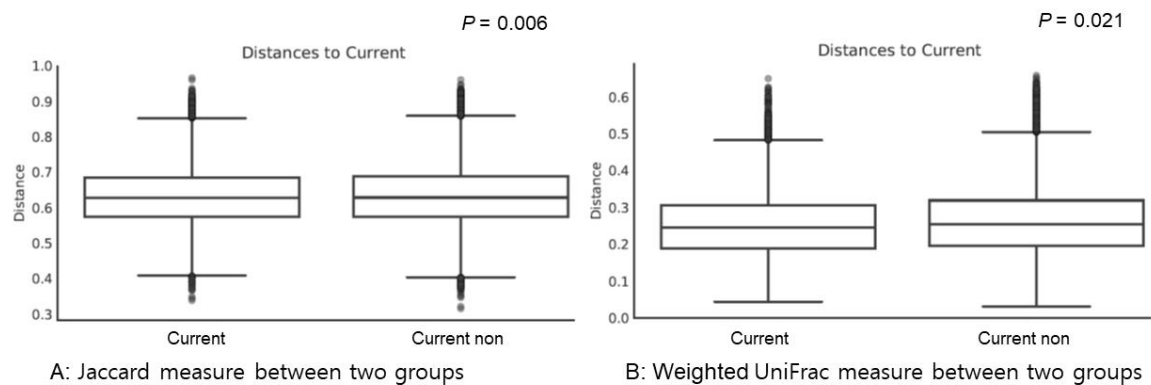

**Figure S4 Bar chart of proportional abundance of phylum (A) and family (B) levels between current smokers and current non-smokers**

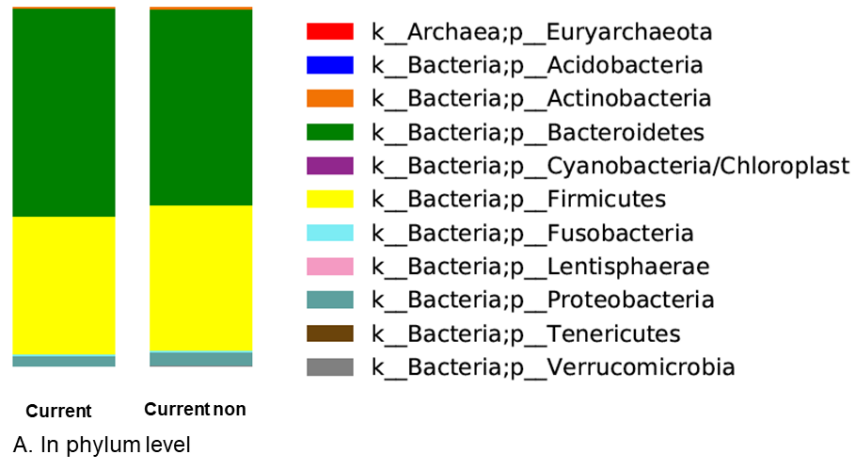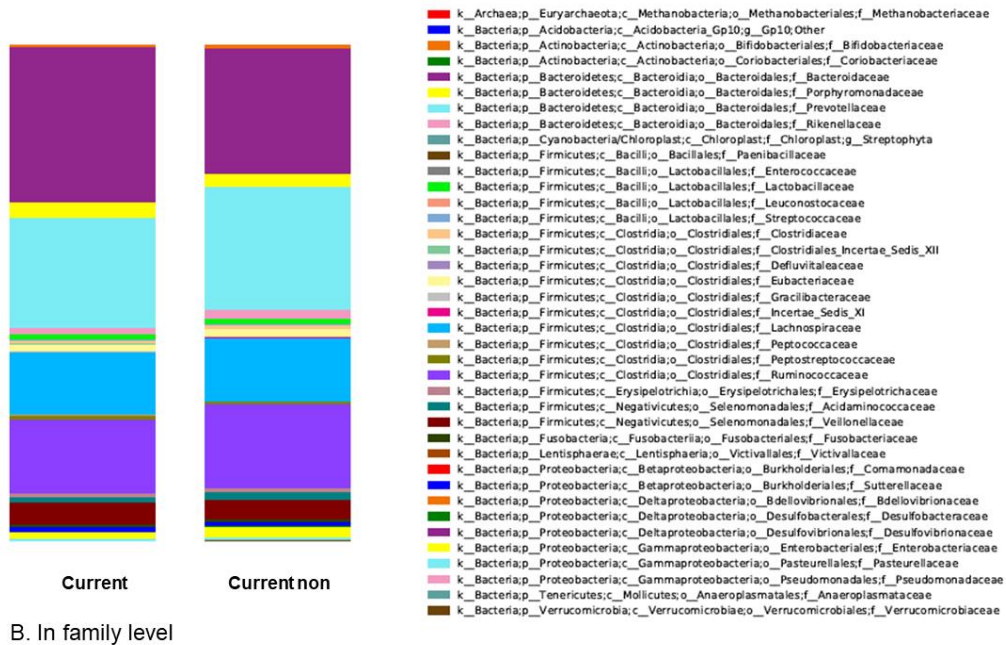

**Figure S5 Comparison among groups of phylum Bacteroidetes and phylum Firmicutes with a high proportion of gut microbiota composition between current smokers and current non-smokers. ns, non-significant; \*or\*\*, true values in analysis of composition of microbiomes.**

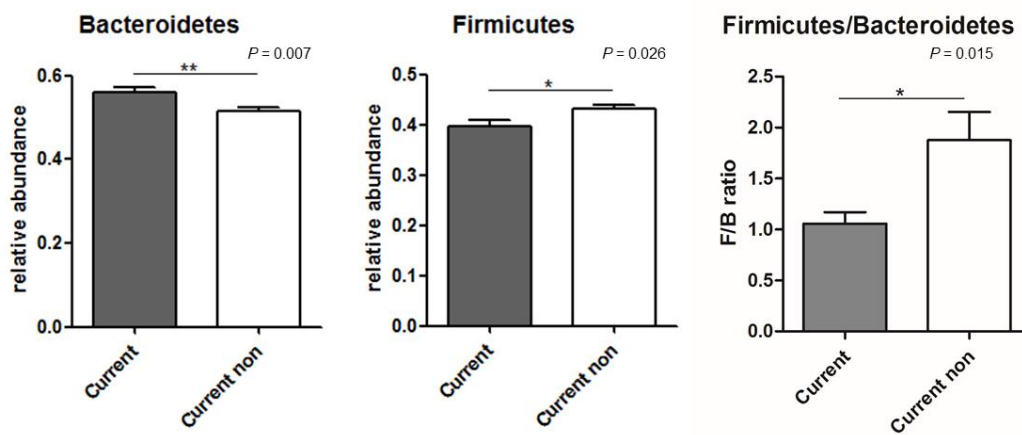

**Table S1 Results of analysis of composition microbiomes**

| Level                    | Taxonomic assignment                                                                                                                          | W  |
|--------------------------|-----------------------------------------------------------------------------------------------------------------------------------------------|----|
| <b>Never vs. current</b> |                                                                                                                                               |    |
| <b>Class</b>             | None                                                                                                                                          |    |
| <b>Order</b>             | k__Bacteria;p__Bacteroidetes;c__Bacteroidia;o__Bacteroidales (increased in current smoker) *                                                  | 1  |
|                          | k__Bacteria;p__Fusobacteria;c__Fusobacteriia;o__Fusobacteriales (decreased in current smoker)                                                 | 1  |
|                          | k__Bacteria;p__Proteobacteria;c__Gammaproteobacteria;o__Enterobacteriales (decreased in current smoker)                                       | 2  |
| <b>Genus</b>             | k__Bacteria;p__Bacteroidetes;c__Bacteroidia;o__Bacteroidales;f__Bacteroidaceae;g__Bacteroides (increased in current smoker) *                 | 3  |
|                          | k__Bacteria;p__Bacteroidetes;c__Bacteroidia;o__Bacteroidales;f__Porphyromonadaceae;g__Parabacteroides (increased in current smoker) *         | 1  |
|                          | k__Bacteria;p__Firmicutes;c__Bacilli;o__Lactobacillales;f__Lactobacillaceae;g__Lactobacillus (increased in current smoker) *                  | 7  |
|                          | k__Bacteria;p__Firmicutes;c__Clostridia;o__Clostridiales;f__Clostridiales_Incertae_Sedis_XII;g__Acidaminobacter (decreased in current smoker) | 1  |
|                          | k__Bacteria;p__Firmicutes;c__Clostridia;o__Clostridiales;f__Gracilibacteraceae;g__Gracilibacter (decreased in current smoker)                 | 1  |
|                          | k__Bacteria;p__Firmicutes;c__Clostridia;o__Clostridiales;f__Lachnospiraceae;g__Howardella (decreased in current smoker)                       | 1  |
|                          | k__Bacteria;p__Firmicutes;c__Clostridia;o__Clostridiales;f__Lachnospiraceae;g__Lachnospiraceae_incertae_sedis (increased in current smoker) * | 1  |
|                          | k__Bacteria;p__Firmicutes;c__Clostridia;o__Clostridiales;f__Lachnospiraceae;g__Pseudobutyrvibrio (decreased in current smoker)                | 2  |
|                          | k__Bacteria;p__Firmicutes;c__Clostridia;o__Clostridiales;f__Lachnospiraceae;g__Roseburia (increased in current smoker) *                      | 5  |
|                          | k__Bacteria;p__Firmicutes;c__Clostridia;o__Clostridiales;f__Peptococcaceae;g__Desulfotomaculum (decreased in current smoker)                  | 4  |
|                          | k__Bacteria;p__Firmicutes;c__Clostridia;o__Clostridiales;f__Ruminococcaceae;g__Acetanaerobacterium (decreased in current smoker)              | 12 |
|                          | k__Bacteria;p__Firmicutes;c__Clostridia;o__Clostridiales;f__Ruminococcaceae;g__Acetivibrio (decreased in current smoker)                      | 1  |
|                          | k__Bacteria;p__Firmicutes;c__Clostridia;o__Clostridiales;f__Ruminococcaceae;g__Clostridium_III (decreased in current smoker)                  | 3  |

|                                                        |                                                                                                                                              |   |
|--------------------------------------------------------|----------------------------------------------------------------------------------------------------------------------------------------------|---|
|                                                        | k__Bacteria;p__Firmicutes;c__Clostridia;o__Clostridiales;f__Ruminococcaceae;g__Ethanoligenens (decreased in current smoker)                  | 1 |
|                                                        | k__Bacteria;p__Firmicutes;c__Clostridia;o__Clostridiales;f__Ruminococcaceae;g__Sporobacter (decreased in current smoker)                     | 1 |
|                                                        | k__Bacteria;p__Firmicutes;c__Negativicutes;o__Selenomonadales;f__Acidaminococcaceae;g__Acidaminococcus (decreased in current smoker)         | 1 |
|                                                        | k__Bacteria;p__Fusobacteria;c__Fusobacteriia;o__Fusobacteriales;f__Fusobacteriaceae;g__Fusobacterium (decreased in current smoker)           | 1 |
|                                                        | k__Bacteria;p__Proteobacteria;c__Betaproteobacteria;o__Burkholderiales;f__Comamonadaceae;g__Schlegelella (decreased in current smoker)       | 1 |
|                                                        | k__Bacteria;p__Proteobacteria;c__Gammaproteobacteria;o__Enterobacteriales;f__Enterobacteriaceae;g__Citrobacter (decreased in current smoker) | 1 |
|                                                        | k__Bacteria;p__Tenericutes;c__Mollicutes;o__Anaeroplasmatales;f__Anaeroplasmataceae;g__Asteroleplasma (decreased in current smoker)          | 1 |
| <b>Former vs. current</b>                              |                                                                                                                                              |   |
| <b>Class</b>                                           | None                                                                                                                                         |   |
| <b>Order</b>                                           | None                                                                                                                                         |   |
| <b>Genus</b>                                           | None                                                                                                                                         |   |
| <b>Never vs. former</b>                                |                                                                                                                                              |   |
| <b>Class</b>                                           | None                                                                                                                                         |   |
| <b>Order</b>                                           | None                                                                                                                                         |   |
| <b>Genus</b>                                           | None                                                                                                                                         |   |
| <b>Current non-smoker (never + former) vs. current</b> |                                                                                                                                              |   |
| <b>Phylum</b>                                          | k__Bacteria;p__Bacteroidetes (increased in current smoker) *                                                                                 | 4 |
| <b>Class</b>                                           | k__Bacteria;p__Fusobacteria;c__Fusobacteriia (decreased in current smoker)                                                                   | 1 |
|                                                        | k__Bacteria;p__Proteobacteria;c__Gammaproteobacteria (decreased in current smoker)                                                           | 2 |
| <b>Order</b>                                           | k__Bacteria;p__Bacteroidetes;c__Bacteroidia;o__Bacteroidales (increased in current smoker) *                                                 | 1 |
|                                                        | k__Bacteria;p__Fusobacteria;c__Fusobacteriia;o__Fusobacteriales (decreased in current smoker)                                                | 1 |



|               |                                                                                                                                              |    |
|---------------|----------------------------------------------------------------------------------------------------------------------------------------------|----|
|               | k__Bacteria;p__Proteobacteria;c__Gammaproteobacteria;o__Enterobacteriales (decreased in current smoker)                                      | 2  |
| <b>Family</b> | k__Bacteria;p__Bacteroidetes;c__Bacteroidia;o__Bacteroidales;f__Bacteroidaceae (increased in current smoker) *                               | 5  |
|               | k__Bacteria;p__Bacteroidetes;c__Bacteroidia;o__Bacteroidales;f__Rikenellaceae (decreased in current smoker)                                  | 1  |
|               | k__Bacteria;p__Firmicutes;c__Clostridia;o__Clostridiales;f__Clostridiales_Incertae_Sedis_XII (decreased in current smoker)                   | 1  |
|               | k__Bacteria;p__Firmicutes;c__Clostridia;o__Clostridiales;f__Gracilibacteraceae (decreased in current smoker)                                 | 1  |
|               | k__Bacteria;p__Fusobacteria;c__Fusobacteriia;o__Fusobacteriales;f__Fusobacteriaceae (decreased in current smoker)                            | 1  |
|               | k__Bacteria;p__Proteobacteria;c__Gammaproteobacteria;o__Enterobacteriales;f__Enterobacteriaceae (decreased in current smoker)                | 2  |
| <b>Genus</b>  | k__Bacteria;p__Bacteroidetes;c__Bacteroidia;o__Bacteroidales;f__Bacteroidaceae;g__Bacteroides (increased in current smoker) *                | 3  |
|               | k__Bacteria;p__Firmicutes;c__Bacilli;o__Lactobacillales;f__Lactobacillaceae;g__Lactobacillus (increased in current smoker) *                 | 1  |
|               | k__Bacteria;p__Firmicutes;c__Clostridia;o__Clostridiales;f__Lachnospiraceae;g__Roseburia (increased in current smoker) *                     | 1  |
|               | k__Bacteria;p__Firmicutes;c__Clostridia;o__Clostridiales;f__Ruminococcaceae;g__Acetanaerobacterium (decreased in current smoker)             | 10 |
|               | k__Bacteria;p__Firmicutes;c__Clostridia;o__Clostridiales;f__Ruminococcaceae;g__Acetivibrio (decreased in current smoker)                     | 1  |
|               | k__Bacteria;p__Firmicutes;c__Clostridia;o__Clostridiales;f__Ruminococcaceae;g__Clostridium_IV (decreased in current smoker)                  | 1  |
|               | k__Bacteria;p__Firmicutes;c__Clostridia;o__Clostridiales;f__Ruminococcaceae;g__Ethanoligenens (decreased in current smoker)                  | 1  |
|               | k__Bacteria;p__Firmicutes;c__Negativicutes;o__Selenomonadales;f__Acidaminococcaceae;g__Acidaminococcus (decreased in current smoker)         | 1  |
|               | k__Bacteria;p__Fusobacteria;c__Fusobacteriia;o__Fusobacteriales;f__Fusobacteriaceae;g__Fusobacterium (decreased in current smoker)           | 1  |
|               | k__Bacteria;p__Proteobacteria;c__Betaproteobacteria;o__Burkholderiales;f__Comamonadaceae;g__Schlegelella (decreased in current smoker)       | 1  |
|               | k__Bacteria;p__Proteobacteria;c__Deltaproteobacteria;o__Desulfovibrionales;f__Desulfovibrionaceae;g__Bilophila (decreased in current smoker) | 1  |
|               | k__Bacteria;p__Proteobacteria;c__Gammaproteobacteria;o__Enterobacteriales;f__Enterobacteriaceae;g__Citrobacter (decreased in current smoker) | 1  |

**k, kingdom; p, phylum; c, class; o, order; f, family; \* Marking bacteria are increased in current smoker**

**Table S2. Baseline characteristic of study population between Current non-smoker and current smokers**

|                                       | Current non-smoker (N=555) | current smoker (N=203) | P-value |
|---------------------------------------|----------------------------|------------------------|---------|
| Age, year                             | 45.6±9.0                   | 45.7±8.2               | 0.947   |
| BMI, kg/m <sup>2</sup>                | 24.6±2.8                   | 24.8±3.1               | 0.580   |
| Muscle mass, kg                       | 52.7±5.6                   | 53.2±6.0               | 0.304   |
| Fat mass, kg                          | 17.2±5.6                   | 17.2±5.7               | 0.879   |
| Creatinine, mg/dL                     | 1.00±0.12                  | 0.97±0.13              | 0.005   |
| eGFR, MDRD, ml/min/1.73m <sup>2</sup> | 87.9±12.4                  | 91.5±14.6              | 0.002   |
| Iron, µg/dL                           | 127.0±38.5                 | 127.9±38.7             | 0.813   |
| Ferritin, ng/mL                       | 210.4±123.1                | 224.8±164.4            | 0.199   |
| C-reactive protein, mg/dL             | 0.11±0.19                  | 0.12±0.19              | 0.489   |
| Comorbidities                         |                            |                        |         |
| Diabetes mellitus                     | 38 (6.8)                   | 15 (7.4)               | 0.872   |
| Hypertension                          | 113 (20.4)                 | 36 (17.7)              | 0.470   |
| COPD                                  | 22 (4)                     | 15 (7.4)               | 0.202   |
| Liver disease*                        | 104 (18.7)                 | 33 (16.3)              | 0.457   |
| Dyslipidemia                          | 109 (19.6)                 | 41 (20.2)              | 0.918   |
| Kidney disease <sup>†</sup>           | 24 (4.3)                   | 7 (3.4)                | 0.683   |
| Spirometry                            |                            |                        |         |
| FVC, % predicted                      | 89.4±9.1                   | 90.2±9.5               | 0.293   |
| FEV <sub>1</sub> , % predicted        | 89.6±9.3                   | 88.7±10.7              | 0.583   |
| FEV <sub>1</sub> /FVC (%)             | 80.5±5.9                   | 79.3±6.9               | 0.015   |
| Nutrition                             |                            |                        |         |
| Total energy, kcal/day                | 1453.0±623.0               | 1523.4±634.9           | 0.236   |
| Total protein, g/day                  | 50.0±25.6                  | 53.1±25.4              | 0.199   |
| Total fat, g/day                      | 29.0±19.5                  | 30.8±19.3              | 0.328   |
| Total carbohydrate, g/day             | 243.8±103.5                | 253.7±111.3            | 0.326   |
| Total calcium mg/day                  | 301.4±194.5                | 306.6±186.5            | 0.772   |
| Total phosphorus, mg/day              | 721.0±342.3                | 759.1±344.2            | 0.242   |
| Total vitamin A, µg/day               | 310.6±213.9                | 344.8±230.4            | 0.099   |
| Total sodium, mg/day                  | 1596.5±1010.1              | 1809.8±1093.8          | 0.030   |
| Vitamin B1, mg/day                    | 0.85±0.45                  | 0.91±0.46              | 0.115   |
| Vitamin C, mg/day                     | 65.1±53.1                  | 66.7±47.2              | 0.739   |
| Folate, mg/day                        | 143.6±92.8                 | 152.8±93.5             | 0.297   |
| Retinol, µg/day                       | 71.4±58.5                  | 72.9±60.6              | 0.786   |
| Fiber, g/day                          | 3.6±2.0                    | 3.8±2.1                | 0.319   |
| Cholesterol, mg/day                   | 171.6±145.8                | 182.6±151.5            | 0.431   |

Values represented as mean ± standard deviation or N (%); BMI, body mass index; COPD, chronic obstructive pulmonary disease; FVC, forced vital capacity; FEV<sub>1</sub>, forced expiratory volume in one second; eGFR, estimated glomerular filtration rate; MDRD, Modification of Diet in Renal Disease; \*Liver disease including hepatitis B, hepatitis C, liver cirrhosis, fatty liver; <sup>†</sup>Kidney disease including chronic kidney disease, ureter stone, benign prostate hypertrophy
